# Supplementary material for: Sensitization of Patient-Derived Colorectal Cancer Organoids to Photon and Proton Radiation by Targeting DNA Damage Response Mechanisms
Source: MDPI journal article supplement (doi:10.3390/cancers14204984), 2022-10-11
Supplement: s1 [file s1]

Supplementals

# Sensitization of Patient-Derived Colorectal Cancer Organoids to Photon and Proton Radiation by Targeting DNA Damage Response Mechanisms

Kristin Pape <sup>1,2,†</sup>, Anna J. Lößner <sup>1,2,†</sup>, Doreen William <sup>3,4,5</sup>, Tabea Czempel <sup>3,4,5</sup>, Elke Beyreuther <sup>6,7</sup>, Anna Klimova <sup>2</sup>, Claudia Lehmann <sup>1,2</sup>, Tim Schmäche <sup>1,2</sup>, Sebastian R. Merker <sup>1,2</sup>, Max Naumann <sup>4,6</sup>, Anne-Marlen Ada <sup>1,2</sup>, Franziska Baenke <sup>1,2</sup>, Therese Seidlitz <sup>1,2</sup>, Rebecca Bütof <sup>2,6,8,9</sup>, Antje Dietrich <sup>4,6</sup>, Mechthild Krause <sup>2,4,6,8,9</sup>, Jürgen Weitz <sup>1,2</sup>, Barbara Klink <sup>2,3,4,5,11</sup>, Cläre von Neubeck <sup>4,6,10</sup> and Daniel E. Stange <sup>1,2,\*</sup>

## (a) Viability assays

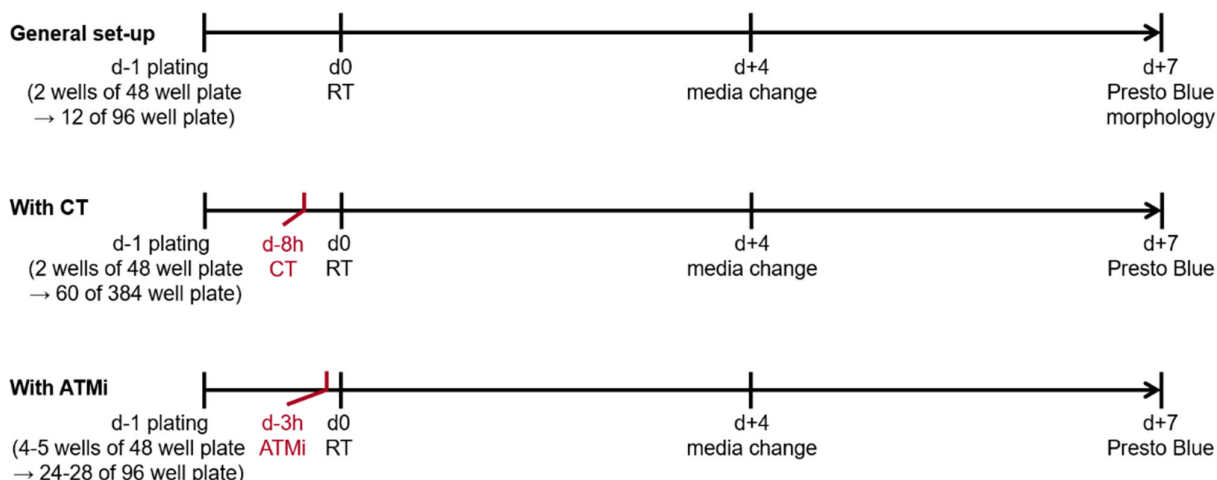

## (b) Functional assays

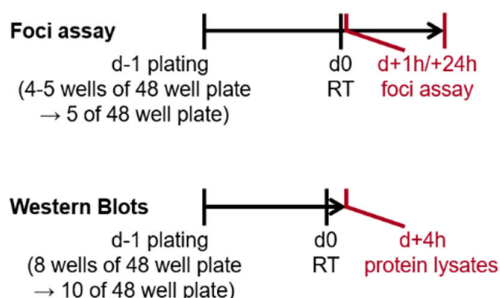

**Figure S1.** Timelines of experiments: (a) viability and (b) functional assays.

**DD47**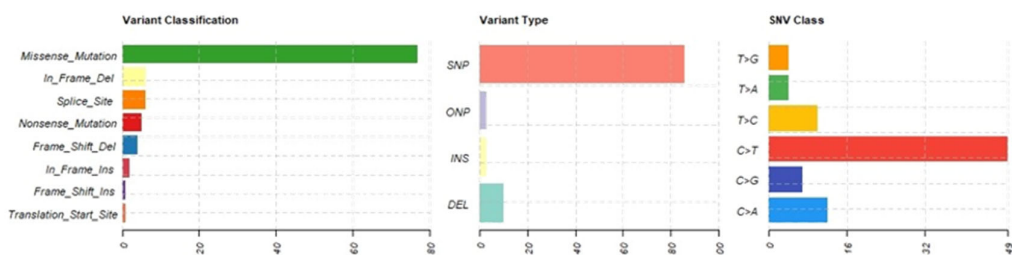**DD72**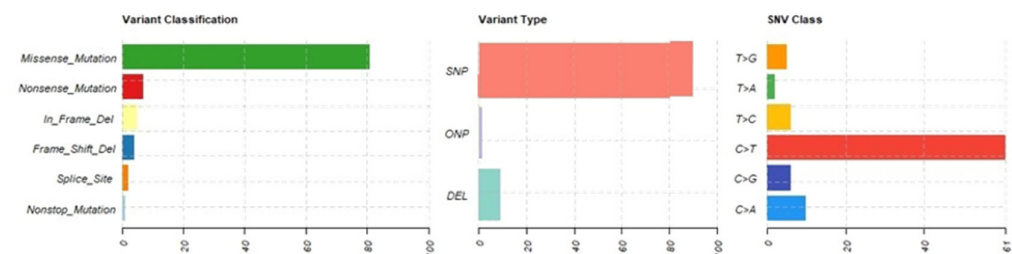**DD142**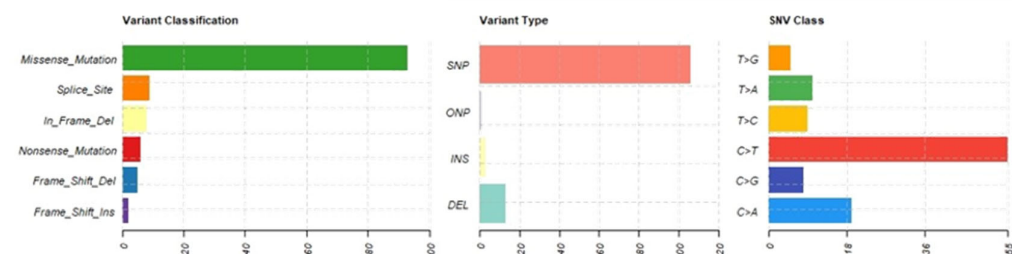**DD204**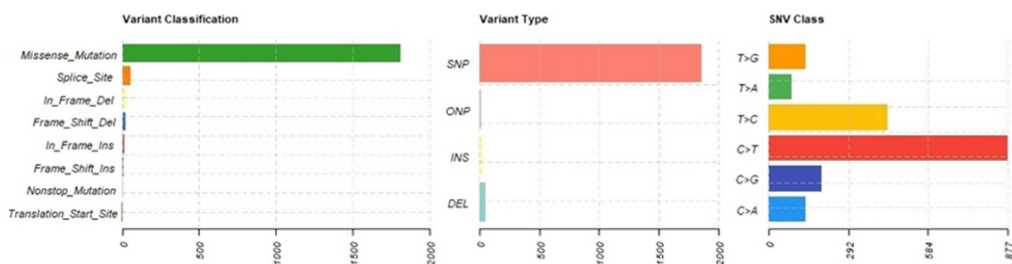**DD254**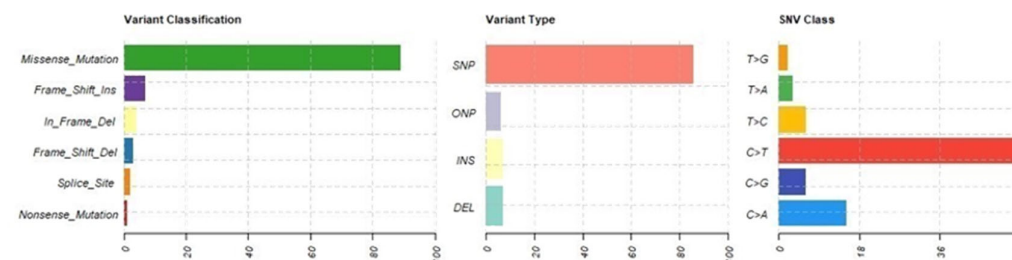

Figure S2: Variant classification of CRC PDOs.

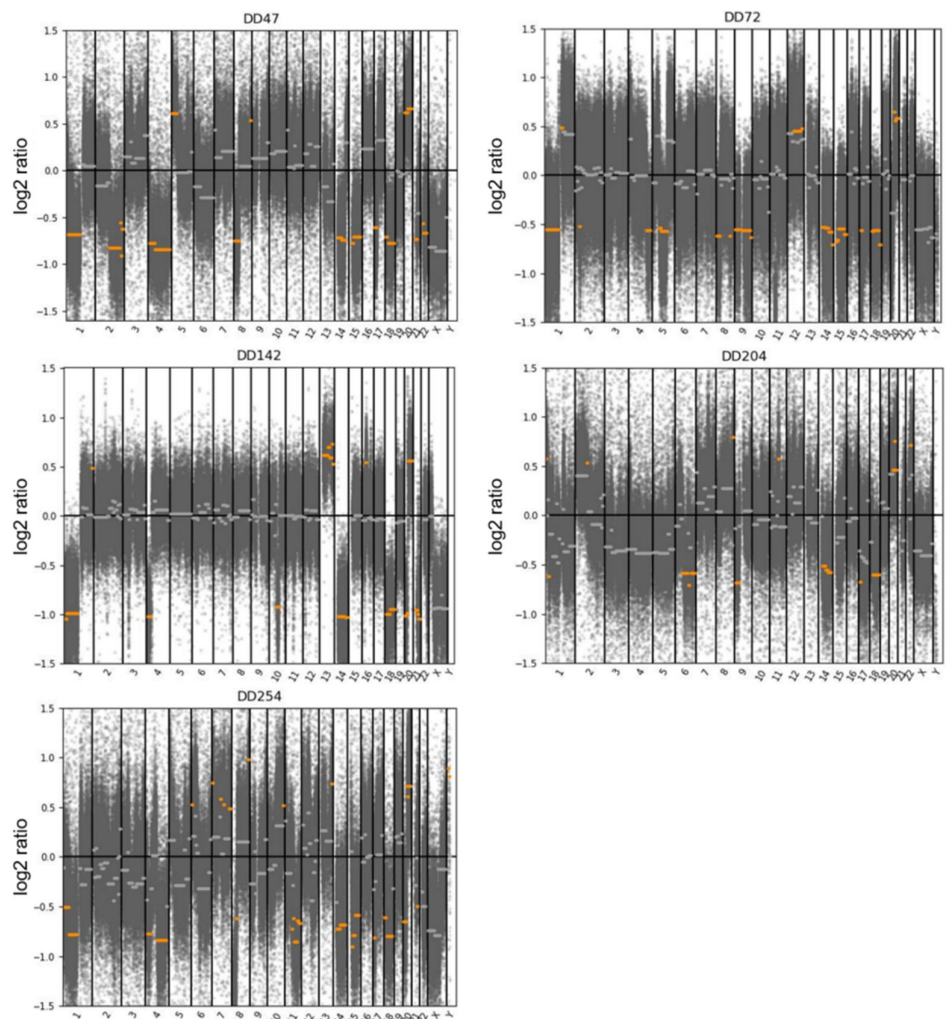

Figure S3: CNVs in CRC PDOs versus pooled normal organoids.

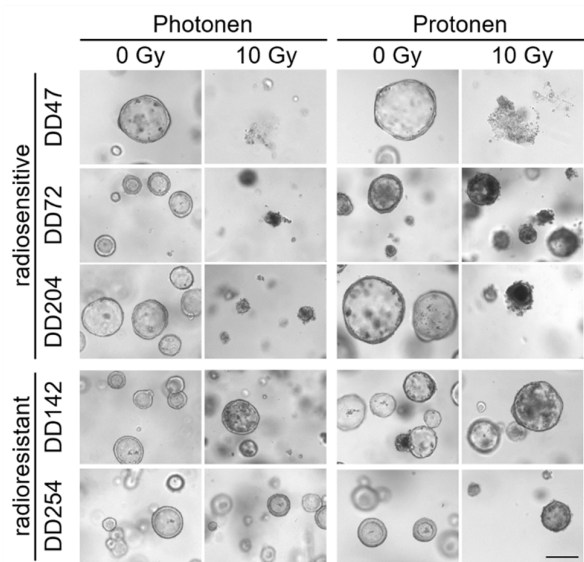

Figure S4: Exemplary pictures of organoid morphology upon control (0 Gy) and 10 Gy irradiation. Scale bar: 200 µM.

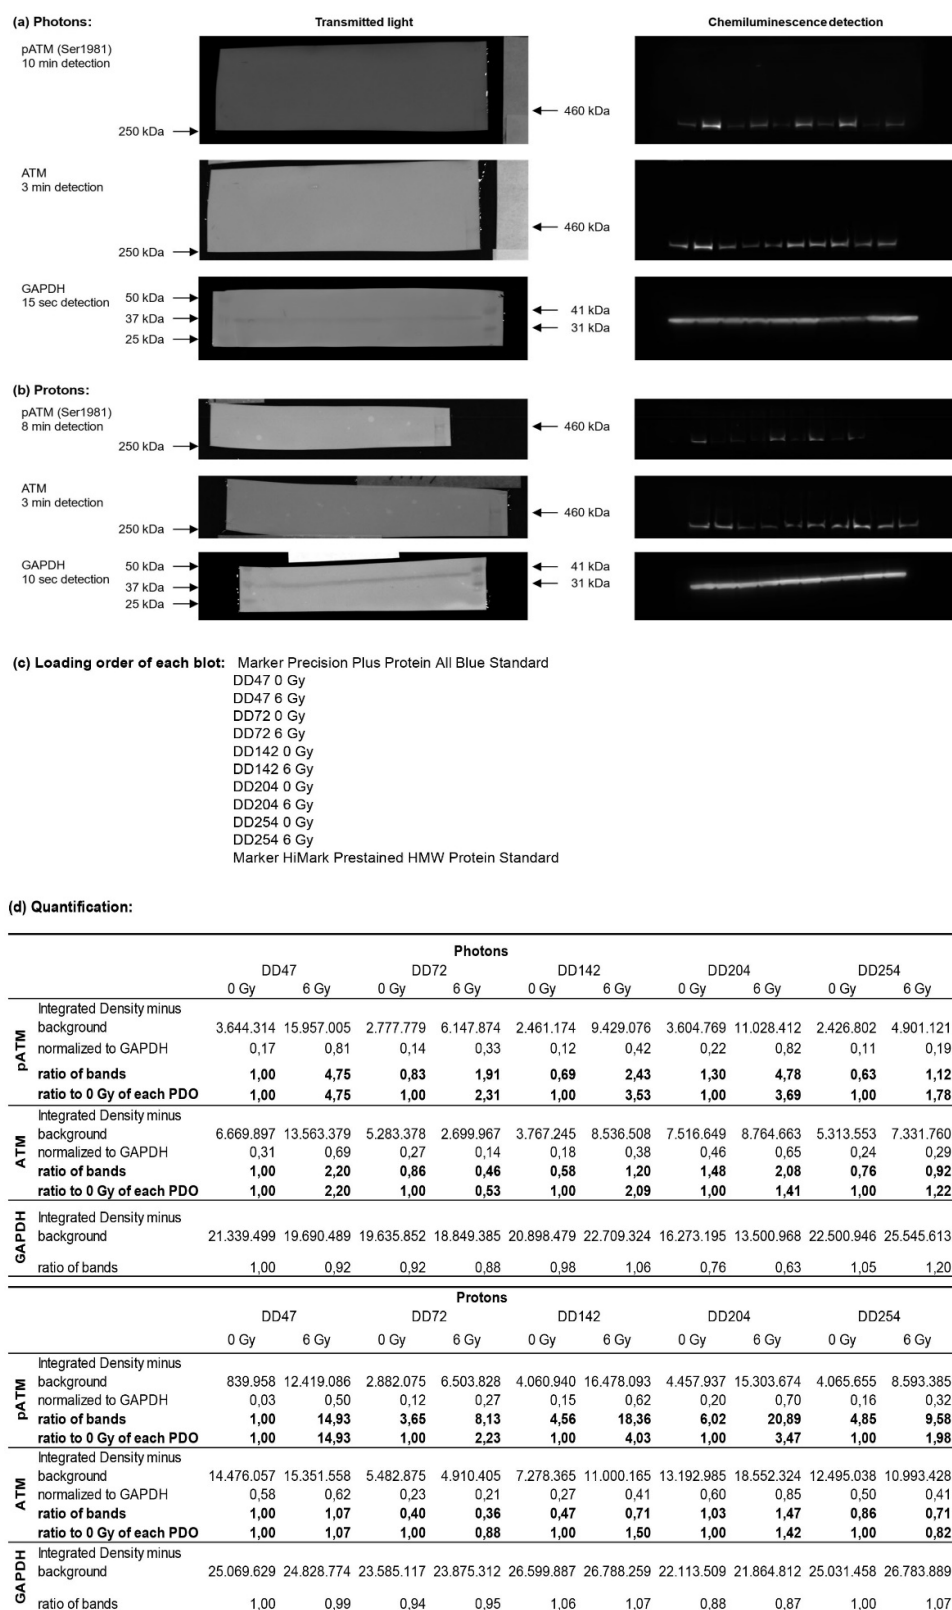

**Figure S5.** Original Western blots belonging to Figure 5. Western blot analysis of CRC PDOs 4 h post (a) photon and (b) proton irradiation for (phosphorylated) ATM. GAPDH served as a loading control. (c) The loading order of each blot is listed. (d) Quantification was performed with ImageJ.

**Table S1.** Patient's characteristics. The average growth rate of the PDOs was determined by Presto Blue assay.

| Patient ID | Sex | Age <sup>*1</sup> | Diagnosis                         | TNM classification | Average growth rate <sup>*2</sup> | Neoadjuvant therapy                                                      | Tumor Regression <sup>*3</sup> |
|------------|-----|-------------------|-----------------------------------|--------------------|-----------------------------------|--------------------------------------------------------------------------|--------------------------------|
| DD47       | M   | 63                | Recto-sigmoid cancer              | pT2, pN0, M0       | 0.89                              | -                                                                        | -                              |
| DD72       | M   | 54                | Rectal cancer                     | ypT3c, ypN1a, M0   | 0.74                              | Σ50.4Gy, 2 cycles 5-FU, FOLFOX                                           | unknown                        |
| DD142      | M   | 58                | Local recurrence of rectal cancer | rypT4b, rypNx, M0  | 0.98                              | Primary tumor: Σ25 Gy, FOLFOX, XELOX<br>Local recurrence: Σ40.8 Gy, 5-FU | 1                              |
| DD204      | M   | 58                | Rectal cancer                     | ypT2, ypN0, M0     | 0.93                              | Σ 50.4 Gy, 2 cycles 5-FU                                                 | 2-3                            |
| DD254      | M   | 72                | Recto-sigmoid cancer              | pT3b, pN0, M1      | 0.99                              | -                                                                        | -                              |

<sup>\*1</sup> at diagnosis; <sup>\*2</sup> of PDOs per day, calculated as factor per day via PrestoBlue; <sup>\*3</sup> according to Dworak et al. 2007.

**Table S4.** Statistical interaction effects of ATM inhibitors and radiotherapy.

|       | AZ32 (0/3 µM)<br>+ irradiation (0/6 Gy) |              | KU-55933 (0/10 µM)<br>+ irradiation (0/6 Gy) |               |
|-------|-----------------------------------------|--------------|----------------------------------------------|---------------|
|       | photons                                 | protons      | photons                                      | protons       |
| DD47  | Synergy                                 | Synergy      | Synergy                                      | Synergy       |
|       | - 27.6%                                 | - 16.2%      | - 18.7%                                      | - 14.7%       |
|       | $P = 0.233$                             | $P = 0.404$  | $P = 0.708$                                  | $P = 0.59626$ |
| DD72  | Antagonism                              | Synergy      | Synergy                                      | Synergy       |
|       | + 17.8%                                 | - 38.8%      | - 24.8%                                      | - 42.5%       |
|       | $P = 0.711$                             | $P = 0.085$  | $P = 0.541$                                  | $P = 0.114$   |
| DD204 | Synergy                                 | Synergy      | Synergy                                      | Synergy       |
|       | - 46.7%                                 | - 39.8%      | - 68.1%                                      | - 60.9%       |
|       | $P = 0.275$                             | $P = 0.020$  | $P = 0.026$                                  | $P = 0.022$   |
| DD142 | Synergy                                 | Synergy      | Synergy                                      | Synergy       |
|       | - 48.8%                                 | - 46.8%      | - 65.5%                                      | - 58.2%       |
|       | $P = 0.003$                             | $P = 0.013$  | $P = 0.043$                                  | $P = 0.006$   |
| DD254 | Synergy                                 | Synergy      | Synergy                                      | Synergy       |
|       | - 26.8%                                 | - 27.2%      | - 52.0%                                      | - 42.8%       |
|       | $P = 0.157$                             | $P = 0.2085$ | $P = 0.094$                                  | $P = 0.078$   |
